# Supplementary material
Source: publisher figshare collection journal article supplement (https://acs.figshare.com/ndownloader/files/4732216)
Supplement: Supplementary file 1 [file 4732216]

# Single Isomer Iodochlorination of Alkynes and Chlorination of Alkenes Using Tetrabutylammonium Iodide and Dichloroethane

*Michael L. Ho, Alison B. Flynn, William W. Ogilvie\**

Department of Chemistry, University of Ottawa, 10 Marie Curie, Ottawa, Ontario,  
Canada K1N 6N5

Email: wogilvie@science.uottawa.ca

## **Table of Contents**

|                                                                                              |     |
|----------------------------------------------------------------------------------------------|-----|
| General.....                                                                                 | S1  |
| Synthetic Methods .....                                                                      | S2  |
| General procedure for the halogenation of alkenes and alkynes using Bu <sub>4</sub> NI/DCE.. | S2  |
| General procedure for the halogenation of alkenes and alkynes using ICl.....                 | S6  |
| Summary of variable Bu <sub>4</sub> NI amount control reactions:.....                        | S10 |
| NMR Spectra .....                                                                            | S12 |

**General.** Reactions were performed under nitrogen in oven-dried glassware equipped with a magnetic stirbar and a rubber septum unless otherwise indicated. Solvents were freshly distilled prior to use as follows: THF over sodium/benzophenone; dichloroethane, dichloromethane and DMF over calcium hydride. Triethylamine and diisopropylethylamine were freshly distilled over calcium hydride. All other were purchased and used without further purification unless otherwise indicated. Reactions were monitored by TLC analysis using glass plates precoated (250  $\mu$ m thickness) with silica gel 60 F254. TLC plates were visualized using ultraviolet light and potassium permanganate stain. Flash chromatography was carried out on 230-400 mesh silica gel 60, or preparatory TLC glass plates precoated with silica gel (Si250F). NMR spectra

were acquired on 300 MHz, 400 MHz or 500 MHz spectrometers in the specified solvent.

Infrared spectra were acquired on a FTIR spectrometer.

## ***Synthetic Methods***

### **General procedure for the halogenation of alkenes and alkynes using Bu<sub>4</sub>Ni/DCE.**

**(*E*)-Methyl 3-chloro-2-iodoacrylate (9).**<sup>1</sup> A solution of methyl-2-propiolate **4** (250 mg, 2.98 mmol, 1.0 equiv) and tetrabutylammonium iodide (3.25 g, 8.95 mmol, 3.0 equiv) in dichloroethane (25 mL) was heated at reflux for 18 h. The reaction mixture was cooled, diluted with Et<sub>2</sub>O and washed with NaHSO<sub>3</sub> (20 % wt solution), saturated NaHCO<sub>3</sub> and brine. The organic phase was then dried over anhydrous MgSO<sub>4</sub>, filtered and concentrated *in vacuo*. The pure product was obtained by flash chromatography eluting with hexanes then 5 % EtOAc in hexanes to give the title product as a colorless oil (528 mg, 72 %). <sup>1</sup>H NMR (300 MHz, CDCl<sub>3</sub>) δ 7.00 (s, 1H), 3.79 (s, 3H); <sup>13</sup>C NMR (75 MHz, CDCl<sub>3</sub>) δ 162.6 (C), 129.4 (CH), 84.3 (C), 53.2 (CH<sub>3</sub>); IR (neat) 1728, 1567 cm<sup>-1</sup>; MS (EI) 246 (M<sup>+</sup>); HRMS Calcd for C<sub>4</sub>H<sub>4</sub>ClIO<sub>2</sub> (M<sup>+</sup>) 245.8945, found 245.8926.

**(*E*)-Ethyl 4-(tert-butyldimethylsilyloxy)-3-chloro-2-iodobut-2-enoate (17).** Prepared from ethyl 4-(tert-butyldimethylsilyloxy)but-2-ynoate (100 mg, 0.41 mmol) using a procedure similar to that described above for compound **9** that provided the title compound as a colorless oil (152 mg, 92 %). <sup>1</sup>H NMR (400 MHz, CDCl<sub>3</sub>) δ 4.53 (s, 2H), 4.31 (q, *J* = 7.2 Hz, 2H), 1.34 (t, *J* = 7.2 Hz, 3H), 0.93 (s, 9H), 0.13 (s, 6H); <sup>13</sup>C NMR (100 MHz, CDCl<sub>3</sub>) δ 164.6 (C), 137.1 (C), 80.1 (C), 68.6 (CH<sub>2</sub>), 62.6 (CH<sub>2</sub>), 25.8 (CH<sub>3</sub>), 18.3 (C), 13.9 (CH<sub>3</sub>); IR (neat) 2956, 1733, 1472 cm<sup>-1</sup>; HRMS Calcd for C<sub>8</sub>H<sub>13</sub>ClIO<sub>3</sub>Si

( $M^+$  - *t*-Bu) 346.9367, found 346.9352; Calcd for  $C_{11}H_{19}ClIO_3Si$  ( $M^+$  -  $CH_3$ ) 388.9837, found 388.9830.

**N-Methoxy-N-methylnon-2-ynamide (25).** To a solution of 1-hexyne (2.6 mL, 17.7 mmol, 1.0 equiv) in hexanes (150 mL) at -78 °C was added a solution of butyllithium (2.26 M in THF, 8.63 mL, 19.5 mmol, 1.1 equiv). After 1 hour a solution of N-methoxy-N-methylcarbamoyl chloride<sup>2</sup> (2.40 g, 19.4 mmol, 1.1 equiv) in THF (20 mL) was slowly added *via* canula. The reaction was stirred for 1 hour at -78 °C then allowed to warm to room temperature for 1 hour. The reaction was quenched by the dropwise addition of 10 % HCl and diluted with ether. The organic layer was washed sequentially with a saturated solution of sodium bicarbonate and brine, then dried over anhydrous  $MgSO_4$ , filtered and concentrated. The pure product was obtained by chromatography eluting with 5% EtOAc in hexanes then 20% EtOAc in hexanes to give the title product as a pale yellow oil (3.02 g, 77%).  $^1H$  NMR (400 MHz,  $CDCl_3$ )  $\delta$  3.40 (s, 3H), 2.94 (s, 3H), 2.03 (t,  $J$  = 6.4 Hz, 2H), 1.36 – 1.14 (m, 8H), 0.93 (t,  $J$  = 6.8 Hz, 3H);  $^{13}C$  NMR (100 MHz,  $CDCl_3$ )  $\delta$  73.0 ( $CH_3$ ), 61.8 ( $CH_3$ ), 31.1 ( $CH_2$ ), 30.8 ( $CH_2$ ), 28.4 ( $CH_2$ ), 27.6 ( $CH_2$ ), 22.4 ( $CH_2$ ), 18.8 ( $CH_2$ ), 13.6 ( $CH_3$ ); IR (neat) 2237, 1644  $cm^{-1}$ ; HRMS Calcd for  $C_{11}H_{19}NO_2$  ( $M^+$ ) 197.1416, found 197.1405.

**(*E*)-3-Chloro-2-iodo-N-methoxy-N-methylnon-2-enamide (26).** Prepared from N-methoxy-N-methylnon-2-ynamide (3.02 g, 15.3 mmol) using a procedure similar to that described above for compound **9** that provided the title compound as a colorless oil (5.05 g, 92 %).  $^1H$  NMR (400 MHz,  $C_6D_6$ )  $\delta$  3.22 (s, 3H), 2.82 (s, 3H), 2.46 (br s, 2H), 1.48 – 1.45 (m, 2H), 1.19 – 1.14 (m, 6H), 0.84 (t,  $J$  = 6.8 Hz, 3H);  $^{13}C$  NMR (100 MHz,  $C_6D_6$ )  $\delta$  166.3 (C), 135.1 (C), 82.7 (C), 60.8 ( $CH_3$ ), 40.4 ( $CH_2$ ), 32.4 ( $CH_3$ ), 31.8 ( $CH_2$ ), 28.3

(CH<sub>2</sub>), 27.1 (CH<sub>2</sub>), 22.8 (CH<sub>2</sub>), 14.1 (CH<sub>3</sub>); IR (neat) 2954, 2930, 2858, 1654, 1459 cm<sup>-1</sup>; HRMS Calcd for C<sub>11</sub>H<sub>10</sub>ClIO<sub>2</sub> (M<sup>+</sup>) 359.0149, found 359.0201.

**(*E*)-5-Chloro-6-iododec-5-ene (28).** Prepared from 5-decyne (0.13 mL, 0.76 mmol) using a procedure similar to that described above for compound **9** that provided the title compound as a colorless oil (210 mg, 92 %). <sup>1</sup>H NMR (400 MHz, acetone-d<sub>6</sub>) δ 2.68 (t, *J* = 7.2 Hz, 4H), 1.60 – 1.48 (m, 4H), 1.39 – 1.32 (m, 4H), 0.94 (t, *J* = 7.2 Hz, 3H), 0.93 (t, *J* = 7.2 Hz, 3H); <sup>13</sup>C NMR (100 MHz, acetone-d<sub>6</sub>) δ 133.0 (C), 100.6 (C), 44.3 (CH<sub>2</sub>), 43.2 (CH<sub>2</sub>), 32.2 (CH<sub>2</sub>), 30.9 (CH<sub>2</sub>), 23.3 (CH<sub>2</sub>), 23.0 (CH<sub>2</sub>), 15.2 (CH<sub>3</sub>), IR (neat) 2957, 2860, 1623, 1464 cm<sup>-1</sup>; MS (EI) 300 (M<sup>+</sup>); HRMS Calcd for C<sub>10</sub>H<sub>18</sub>ClI (M<sup>+</sup>) 300.0142, found 300.0132.

**(*E*)-(2-Chloro-3-iodobut-2-ene-1,4-diyl)bis(oxy)bis(methylene)dibenzene (30).** Prepared from 1,4-bis(benzyloxy)but-2-yne<sup>3</sup> (50 mg, 0.19 mmol) using a procedure similar to that described above for compound **9** that provided the title compound as a colorless oil (75 mg, 93 %). <sup>1</sup>H NMR (400 MHz, acetone-d<sub>6</sub>) δ 7.42 – 7.29 (m, 10 H), 4.57 (s, 2H), 4.55 (s, 2H), 4.51 (s, 2H), 4.44 (s, 2H); <sup>13</sup>C NMR (100 MHz, acetone-d<sub>6</sub>) δ 139.9 (C), 139.8 (C), 132.7 (C), 130.03 (CH), 130.01 (CH), 129.63 (CH), 129.56 (CH), 129.41 (CH), 129.38 (CH), 102.6 (C), 77.9 (CH<sub>2</sub>), 74.8 (CH<sub>2</sub>), 73.5 (CH<sub>2</sub>), 73.2 (CH<sub>2</sub>); IR (nujol) 2957, 1640, 1458 cm<sup>-1</sup>; MS (EI) 428 (M<sup>+</sup>); HRMS Calcd for C<sub>18</sub>H<sub>18</sub>ClIO<sub>2</sub> (M<sup>+</sup>) 428.0040, found 428.0043.

**(2,3-Dichloropropoxy)benzene (33).**<sup>4</sup> Prepared from allyloxybenzene (100 mg, 0.75 mmol) using a procedure similar to that described above for compound **9** that provided the title compound as a colorless oil (151 mg, 99%). <sup>1</sup>H NMR (400 MHz, CDCl<sub>3</sub>) δ 7.34 – 7.31 (m, 2H), 7.05 – 6.94 (m, 3H), 4.41 – 4.35 (m, 1H), 4.30 (dd, *J* = 6.4, 1.2 Hz, 2H),

4.02 – 3.89 (m, 2H);  $^{13}\text{C}$  NMR (100 MHz,  $\text{CDCl}_3$ )  $\delta$  157.9 (C), 129.6 (CH), 121.6 (CH), 114.7 (CH), 68.1 ( $\text{CH}_2$ ), 57.3 (CH), 45.0 ( $\text{CH}_2$ ); IR (neat) 2959, 2933, 1599, 1496  $\text{cm}^{-1}$ ; MS (EI) 204 ( $\text{M}^+$ ); HRMS Calcd for  $\text{C}_9\text{H}_{10}\text{Cl}_2\text{O}$  ( $\text{M}^+$ ) 204.0109, found 204.0105.

**4,5-Dichloropentyl benzoate (36).** Prepared from pent-4-enyl benzoate<sup>5</sup> (100 mg, 0.53 mmol) using a procedure similar to that described above for compound **9** that provided the title compound as a colorless oil (118 mg, 99%).  $^1\text{H}$  NMR (400 MHz,  $\text{CDCl}_3$ )  $\delta$  8.05 (dd,  $J$  = 6.4, 1.2 Hz, 2H), 7.55 – 7.54 (m, 1H), 7.44 (dd,  $J$  = 8.0, 1.6 Hz, 2H), 4.38 – 4.35 (m, 2H), 4.13 – 4.10 (m, 1H), 3.79 (dd,  $J$  = 11.0, 5.0 Hz, 1H), 3.66 (dd,  $J$  = 11.4, 7.8 Hz, 1H), 2.22 – 1.84 (m, 4H);  $^{13}\text{C}$  NMR (100 MHz,  $\text{CDCl}_3$ )  $\delta$  166.4 (C), 132.9 (CH), 130.0 (C), 129.5 (CH), 128.3 (CH), 63.9 ( $\text{CH}_2$ ), 60.4 (CH), 47.9 ( $\text{CH}_2$ ), 31.7 ( $\text{CH}_2$ ), 25.2 ( $\text{CH}_2$ ); IR (neat) 2956, 2849, 1718, 1451  $\text{cm}^{-1}$ ; MS (EI) 260 ( $\text{M}^+$ ); HRMS Calcd for  $\text{C}_{12}\text{H}_{14}\text{ClO}_2$  ( $\text{M}^+ - \text{Cl}$ ) 225.0682, found 225.0700.

**2-(2,3-Dichloropropyl)phenol (39).** Prepared from 2-allylphenol<sup>6</sup> (100 mg, 0.74 mmol) using a procedure similar to that described above for compound **9** that provided the title compound as a colorless oil (135 mg, 89%).  $^1\text{H}$  NMR (400 MHz,  $\text{CDCl}_3$ )  $\delta$  7.23 – 7.16 (m, 2H), 6.94 (dd,  $J$  = 7.4, 7.4 Hz, 1H), 6.79 (d,  $J$  = 8.0 Hz, 1H), 5.42 (br s, 1H), 4.53 – 4.66 (m, 1H), 3.78 (dd,  $J$  = 11.7, 5.5 Hz, 1H), 3.76 (dd,  $J$  = 11.7, 5.36 Hz, 1H), 3.35 (dd,  $J$  = 14.0, 6.0 Hz, 1H), 3.09 (dd,  $J$  = 14.0, 7.6 Hz, 1H);  $^{13}\text{C}$  NMR (100 MHz,  $\text{CDCl}_3$ )  $\delta$  153.6 (C), 131.8 (CH), 128.6 (CH), 123.1 (C), 120.9 (CH), 115.5 (CH), 60.3 (CH), 48.4 ( $\text{CH}_2$ ), 36.5 ( $\text{CH}_2$ ); IR (neat) 3540, 2951, 1609, 1502  $\text{cm}^{-1}$ ; MS (EI) 204 ( $\text{M}^+$ ); HRMS Calcd for  $\text{C}_9\text{H}_{10}\text{Cl}_2\text{O}$  ( $\text{M}^+$ ) 204.0109, found 204.0121.

**Butyl 2,3-dichloropropanoate<sup>7</sup> (48):** Prepared from *n*-butyl acrylate (50 mg, 0.39 mmol) using a procedure similar to that described above for compound **9** that provided

the title compound as a colorless oil (15.5 mg, 20%).  $^1\text{H}$  NMR (400 MHz,  $\text{CDCl}_3$ )  $\delta$  4.42 (dd,  $J = 8.7, 5.2$  Hz, 1H), 4.24 (t,  $J = 6.8$  Hz, 2H), 3.96 (dd,  $J = 11.1, 8.7$  Hz, 1H), 3.80 (dd,  $J = 11.1, 5.2$  Hz, 1H), 1.71 – 1.64 (m, 2H), 1.44 – 1.39 (m, 2H), 0.95 (t,  $J = 7.6$  Hz, 3H);  $^{13}\text{C}$  NMR (100 MHz,  $\text{CDCl}_3$ )  $\delta$  167.1 (C), 66.5 ( $\text{CH}_2$ ), 55.1 (CH), 43.9 ( $\text{CH}_2$ ), 30.4 ( $\text{CH}_2$ ), 18.9 ( $\text{CH}_2$ ), 13.6 ( $\text{CH}_3$ ); IR (neat) 2936, 1750  $\text{cm}^{-1}$ .

### **General procedure for the halogenation of alkenes and alkynes using ICl.**

**Reaction of methyl-2-propiolate with ICl.** To a solution of methyl-2-propiolate **4** (50 mg, 0.60 mmol, 1.0 equiv) in dichloroethane (25 mL) was added iodine monochloride (1.0 M solution in DCM, 0.60 mL, 0.60 mmol, 1 equiv) and the resulting mixture was stirred for 2 h. The reaction was diluted with  $\text{Et}_2\text{O}$  and washed sequentially with  $\text{NaHSO}_3$  (20 % wt solution), saturated  $\text{NaHCO}_3$  and brine. The organic phase was then dried over anhydrous  $\text{MgSO}_4$ , filtered and concentrated *in vacuo*. The pure product was obtained by flash chromatography eluting with hexanes then 5 %  $\text{EtOAc}$  in hexanes to give an inseparable mixture of compounds **9**, **10**, **6**, and **7** as a pale yellow oil (100 mg, 68 %).

(**10**)  $^1\text{H}$  NMR (400 MHz,  $\text{CDCl}_3$ )  $\delta$  7.89 (s, 1H), 3.85 (s, 3H);  $^{13}\text{C}$  NMR (100 MHz,  $\text{CDCl}_3$ )  $\delta$  162.4 (C), 142.6 (CH), 87.7 (C), 53.9 ( $\text{CH}_3$ ). (**6/7**)  $^1\text{H}$  NMR (400 MHz,  $\text{CDCl}_3$ )  $\delta$  7.76 (s, 1H), 3.849 (s, 3H);  $^{13}\text{C}$  NMR (100 MHz,  $\text{CDCl}_3$ )  $\delta$  162.9 (C), 128.3 (C), 85.5 (CH), 53.4 ( $\text{CH}_3$ ); (**6/7**)  $^1\text{H}$  NMR (400 MHz,  $\text{CDCl}_3$ )  $\delta$  7.35 (s, 1H), 3.85 (s, 3H);  $^{13}\text{C}$  NMR (100 MHz,  $\text{CDCl}_3$ )  $\delta$  164.0 (C), 97.5 (C), 87.4 (CH), 53.4 ( $\text{CH}_3$ ); IR (neat) 1725, 1563  $\text{cm}^{-1}$ ; MS (EI) 246 ( $\text{M}^+$ ).

**Reaction of ethyl 2-butynoate with ICl.** Prepared from ethyl 2-butynoate (50 mg, 0.45 mmol) using a procedure similar to that described above for compound **10** that provided an inseparable mixture of **12**, **13**, **14**, and **15** as a yellow oil (110 mg, 90%).

**(13)**  $^1\text{H}$  NMR (300 MHz,  $\text{CDCl}_3$ )  $\delta$  4.27 (q,  $J = 7.2$  Hz, 2H), 2.54 (s, 3H), 1.34 (t,  $J = 7.2$  Hz, 3H);  $^{13}\text{C}$  NMR (75 MHz,  $\text{CDCl}_3$ )  $\delta$  166.1 (C), 128.3 (C), 84.9 (C), 62.6 ( $\text{CH}_2$ ), 38.3 ( $\text{CH}_3$ ), 13.9 ( $\text{CH}_3$ ). **(14/15)**  $^1\text{H}$  NMR (300 MHz,  $\text{CDCl}_3$ )  $\delta$  4.36 (q,  $J = 7.2$  Hz, 2H), 2.66 (s, 3H), 1.35, (t,  $J = 7.2$  Hz, 3H);  $^{13}\text{C}$  NMR (75 MHz,  $\text{CDCl}_3$ )  $\delta$  163.2 (C), 96.9 (C), 64.6 (C), 60.9 ( $\text{CH}_2$ ), 25.2 ( $\text{CH}_3$ ), 13.7 ( $\text{CH}_3$ ). **(14/15)**  $^1\text{H}$  NMR (300 MHz,  $\text{CDCl}_3$ )  $\delta$  4.18 (t,  $J = 7.2$  Hz, 2H), 2.48, (s, 3H), 1.24 (t,  $J = 7.2$  Hz, 3H); IR (neat) 1728, 1627  $\text{cm}^{-1}$ ; MS (EI) 274 ( $\text{M}^+$ ).

**Reaction of 3-cyclohexylpropiolate with ICl.** Prepared from ethyl 3-cyclohexylpropiolate (50 mg, 0.28 mmol) using a procedure similar to that described above for compound **10** that provided an inseparable mixture of **20** and **21** as a yellow oil (95 mg, 99%). **(21)**  $^1\text{H}$  NMR (300 MHz,  $\text{CDCl}_3$ )  $\delta$  4.29 (q,  $J = 7.2$  Hz, 2H), 2.96 (tt,  $J = 11.1, 3.3$  Hz, 1H), 2.20 – 1.16 (m, 10H), 1.33 (t,  $J = 7.2$  Hz, 3H);  $^{13}\text{C}$  NMR (75 MHz,  $\text{CDCl}_3$ )  $\delta$  165.6 (C), 143.0 (C), 68.5 (C), 62.9 ( $\text{CH}_2$ ), 52.0 (CH), 32.8 ( $\text{CH}_2$ ), 26.4 ( $\text{CH}_2$ ), 23.2 ( $\text{CH}_2$ ), 14.3 ( $\text{CH}_3$ ); IR (neat) 1732, 1611  $\text{cm}^{-1}$ ; MS (EI) 342 ( $\text{M}^+$ ).

**Reaction of ethyl phenylpropiolate with ICl.** Prepared from ethyl phenylpropiolate (50 mg, 0.29 mmol) using a procedure similar to that described above for compound **10** that provided an inseparable mixture of **23** and **24** as a yellow oil (89 mg, 93%). **(24)**  $^1\text{H}$  NMR (500 MHz,  $\text{CDCl}_3$ )  $\delta$  7.47 – 7.26 (m, 5H), 3.99 (q,  $J = 7.0$  Hz, 2H), 0.94 (t,  $J = 7.0$  Hz, 3H);  $^{13}\text{C}$  NMR (125 MHz,  $\text{CDCl}_3$ )  $\delta$  165.6 (C), 149.0 (C), 138.6 (C), 134.7 (CH),

129.8 (CH), 127.9 (CH), 81.2 (C), 62.5 (CH<sub>2</sub>), 13.4 (CH<sub>3</sub>); IR (neat) 1728, 1615 cm<sup>-1</sup>; MS (EI) 336 (M<sup>+</sup>).

Prepared from 1,4-bis(benzyloxy)but-2-yne (50 mg, 0.19 mmol) using a procedure similar to that described above for compound **10** that provided an inseparable mixture of compounds **30** and **31** as a yellow oil (81 mg, 99 %). (**31**) <sup>1</sup>H NMR (400 MHz, CDCl<sub>3</sub>) δ 7.49 – 7.29 (m, 10H), 4.57 (s, 2H), 4.54 (s, 2H), 4.51 (s, 2H), 4.47 (s, 2H); <sup>13</sup>C NMR (100 MHz, CDCl<sub>3</sub>) δ 131.3 (C), 128.6 (C), 128.5 (C), 128.4 (CH), 127.92 (CH), 127.88 (CH), 100.8 (C), 81.5 (CH<sub>2</sub>), 76.3 (CH<sub>2</sub>), 73.1 (CH<sub>2</sub>), 71.9 (CH<sub>2</sub>); IR (neat) 1461, 1376 cm<sup>-1</sup>; MS (EI) 393 (M<sup>+</sup> - Cl), 301 (M<sup>+</sup> - I).

**Reaction of alloxybenzene with ICl.** Prepared from allyloxybenzene (50 mg, 0.37 mmol) using a procedure similar to that described above for compound **10** that provided an inseparable mixture of compounds **33** and **34** as a yellow oil (89.8 mg, 82%). (**34**) <sup>1</sup>H NMR (400 MHz, CDCl<sub>3</sub>) δ 7.37 – 7.33 (m, 2H), 7.06 – 7.02 (m, 1H), 6.99 – 6.96 (m, 2H), 4.54 – 4.29 (m, 1H), 4.07 (d, *J* = 6.8 Hz, 2H), 3.74 (dd, *J* = 10.7, 6.4 Hz, 1H), 3.67 (dd, *J* = 10.7, 4.5 Hz, 1H); <sup>13</sup>C NMR (100 MHz, CDCl<sub>3</sub>) δ 157.8 (C), 129.3 (CH), 121.6 (CH), 114.7 (CH), 70.2 (CH<sub>2</sub>), 54.1 (CH), 6.7 (CH<sub>2</sub>); IR (neat) 1594, 1500 cm<sup>-1</sup>; MS (EI) 296 (M<sup>+</sup>).

**Reaction of pent-4-enyl benzoate with ICl.** Prepared from pent-4-enyl benzoate<sup>8</sup> (50 mg, 0.26 mmol) using a procedure similar to that described above for compound **10** that provided an inseparable mixture of compounds **36** and **37** as a colorless oil (85 mg, 92%). (**37**) <sup>1</sup>H NMR (400 MHz, acetone-d<sub>6</sub>) δ 8.06 (d, *J* = 10.4 Hz, 2H), 7.57 (dd, *J* = 10.0, 10.0 Hz), 7.44 (dd, *J* = 10.4, 10.4 Hz), 4.37 (t, *J* = 8.0 Hz, 2H), 4.35 – 4.23 (m, 1H), 4.09 – 3.86 (dd, *J* = 17.2, 5.6 Hz, 1H), 3.83 (dd, *J* = 14.4, 14.4 Hz, 1H), 2.33 – 1.86 (m, 4H); <sup>13</sup>C



NMR (100 MHz, acetone- $d_6$ )  $\delta$  166.5 (C), 133.0 (CH), 130.1 (C), 129.5 (CH), 128.4 (CH), 63.7 (CH<sub>2</sub>), 33.9 (CH), 33.1 (CH<sub>2</sub>), 28.2 (CH<sub>2</sub>), 10.3 (CH<sub>2</sub>); IR (neat) 1718, 1615  $\text{cm}^{-1}$ ; MS (EI) 225 ( $\text{M}^+$  - I), 317 ( $\text{M}^+$  - Cl).

**2-(2-chloro-3-iodopropyl)phenol (40).** Prepared from 2-allylphenol<sup>6</sup> (50 mg, 0.37 mmol) using a procedure similar to that described above for compound **10** that provided compound **40** as a yellow oil (109 mg, 99%). <sup>1</sup>H NMR (400 MHz, CDCl<sub>3</sub>)  $\delta$  7.17 – 7.11 (m, 2H), 6.87 (ddd,  $J$  = 8.0, 7.6, 0.8 Hz, 1H), 6.78 (d,  $J$  = 8.0 Hz), 4.92 – 4.85 (m, 1H), 3.45 (dd,  $J_{\text{AB}}$  = 8.8,  $J_{\text{AX}}$  = 6.4 Hz, 1H), 3.34 (dd,  $J_{\text{AB}}$  = 8.8,  $J_{\text{BX}}$  = 6.1 Hz, 1H), 3.40 (dd,  $J$  = 15.7, 8.9 Hz, 1H), 3.05 (dd,  $J$  = 15.7, 6.4 Hz); <sup>13</sup>C NMR (100 MHz, CDCl<sub>3</sub>)  $\delta$  159.1 (C), 128.2 (CH), 125.7 (C), 125.0 (CH), 120.8 (CH), 109.6 (CH), 81.6 (CH), 36.1 (CH<sub>2</sub>), 8.9 (CH<sub>2</sub>); IR (neat) 1506, 1479  $\text{cm}^{-1}$ ; **HRMS** calc'd for C<sub>9</sub>H<sub>10</sub>ClIO ( $\text{M}^+$ ) 295.9465, found 295.9467.

**Reaction of 5-decene with ICl.**<sup>9</sup> Prepared from 5-decene (0.135 mL, 0.71 mmol) using a procedure similar to that described above for compound **7** that provided compound **43** as an inseparable mixture of 5,6-dichlorodecane (**42**) and 5-chloro-6-iododecane (**43**) as a colorless oil (142 mg, 66%). <sup>1</sup>H NMR (400 MHz, CDCl<sub>3</sub>)  $\delta$  4.26 – 4.21 (m, 1H), 3.93 – 3.88 (m, 1H), 2.11 – 2.03 (m, 1H), 1.98 – 1.80 (m, 3H), 1.62 – 1.52 (m, 2H), 1.46 – 1.27 (m, 6H), 0.93 (t,  $J$  = 7.3 Hz, 3H); <sup>13</sup>C NMR (100 MHz, acetone- $d_6$ )  $\delta$  66.9 (CH), 42.5 (CH), 37.5 (CH<sub>2</sub>), 36.8 (CH), 31.3 (CH<sub>2</sub>), 28.2 (CH<sub>2</sub>), 22.1 (CH<sub>2</sub>), 21.9 (CH<sub>2</sub>), 13.9 (CH<sub>3</sub>); IR (neat) 2957, 2931, 1465  $\text{cm}^{-1}$ ; MS (EI) 302 ( $\text{M}^+$ ); **HRMS** calc'd for C<sub>10</sub>H<sub>20</sub>ClI ( $\text{M}^+$ ) 302.0298, found 302.0218.

**Reaction of ((3-methylbut-3-enyloxy)methyl)benzene with ICl.** Prepared from ((3-methylbut-3-enyloxy)methyl)benzene<sup>10</sup> (50 mg, 0.28 mmol) using a procedure similar to

that described above for compound **10** that provided an inseparable mixture of compounds **45** and **46** as a colorless oil (12 mg, 14%). <sup>1</sup>H NMR (400 MHz, CDCl<sub>3</sub>) δ 7.36 – 7.36 (m, 5H), 4.51 (s, 2H), 3.81 – 3.60 (m, 4H), 2.29 – 2.15 (m, 2H), 1.66 (s, 3H); <sup>13</sup>C NMR (100 MHz, CDCl<sub>3</sub>) δ 138.1 (C), 128.4 (CH), 127.6 (CH), 127.5 (CH), 73.1 (CH<sub>2</sub>), 70.2 (C), 66.7 (CH<sub>2</sub>), 41.2 (CH<sub>2</sub>), 28.6 (CH<sub>3</sub>), 18.9 (CH<sub>2</sub>); IR (neat) 2925, 1273 cm<sup>-1</sup>; MS (EI) 338 (M<sup>+</sup>).

**Reaction of *n*-butyl acrylate with ICl.** Prepared from *n*-butyl acrylate (50 mg, 0.39 mmol) using a procedure similar to that described above for compound **10** that provided an inseparable mixture of compounds **48** and **49** as a yellow oil (67 mg, 61 %).<sup>7</sup>

**Summary of variable Bu<sub>4</sub>NI amount control reactions:**

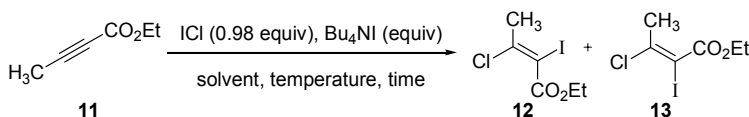

**General procedure:** To a solution of alkyne **11** (50 mg, 0.45 mmol, 1 equiv) in DCE (4.0 mL) was added Bu<sub>4</sub>NI (41 mg, 0.11 mmol, 0.25 equiv). To this was added ICl (1 M solution in DCM, 0.44 mL, 0.44 mmol, 0.98 equiv). The reaction was stirred for 2 hours, upon which time the solution was diluted with Et<sub>2</sub>O and washed sequentially with NaHSO<sub>3</sub> (20 % solution), a saturated solution of NaHCO<sub>3</sub> and brine. The organic layer was dried over anhydrous MgSO<sub>4</sub>, filtered and concentrated to give a mixture of compounds **12:13** (28 mg, 23 % combined yield).

| Equiv Bu <sub>4</sub> NI | Temperature | Time | Solvent | Yield (%)   | 12:13 Ratio    |
|--------------------------|-------------|------|---------|-------------|----------------|
| 0.25                     | rt          | 2 h  | DCE     | 23          | 19:1           |
| 0.50                     | rt          | 2 h  | DCE     | 6           | 19:1           |
| 1.05                     | rt          | 2 h  | DCE     | trace       | -              |
| 3.00                     | rt          | 2 h  | DCE     | no reaction | -              |
| 3.00                     | reflux      | 18 h | DCE     | 30          | 12 exclusively |
| 3.00                     | reflux      | 18 h | benzene | 2           | 12 exclusively |

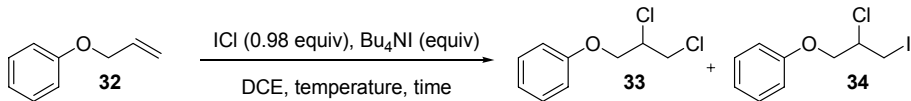

| Equiv Bu <sub>4</sub> NI | Temperature | Time | Solvent | Yield (%) | 33:34                 |
|--------------------------|-------------|------|---------|-----------|-----------------------|
| 0.25                     | rt          | 5 h  | DCE     | 62        | 1:1                   |
| 0.50                     | rt          | 5 h  | DCE     | 11        | 1.2:1                 |
| 1.05                     | rt          | 5 h  | DCE     | 6         | 1:1                   |
| 3.00                     | rt          | 5 h  | DCE     | trace     | 1:1                   |
| 3.00                     | reflux      | 18 h | DCE     | 32        | <b>33 exclusively</b> |
| 3.00                     | reflux      | 18 h | benzene | 9         | <b>33 exclusively</b> |

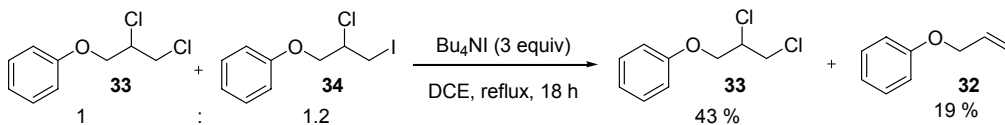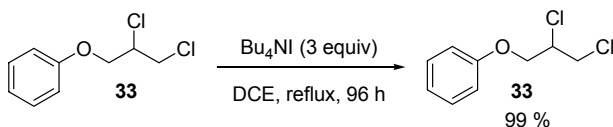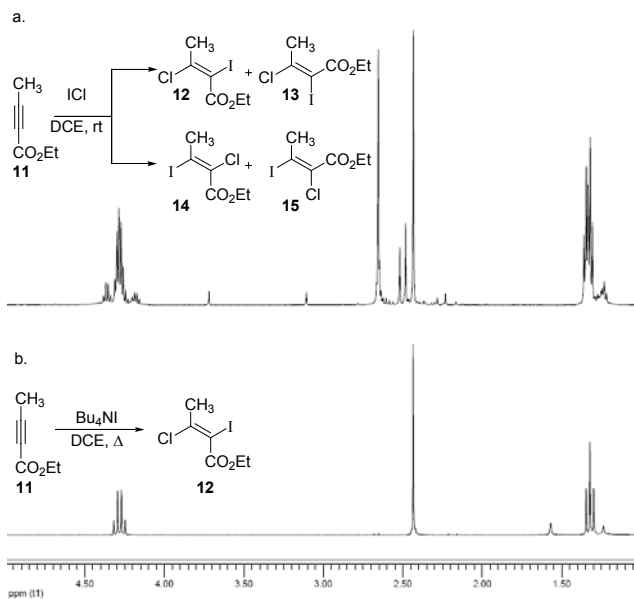

**Figure 1.** Comparison of the crude products obtained from the reaction of **11** with ICl (1a) and with Bu<sub>4</sub>NI/DCE (1b).

## ***NMR Spectra***

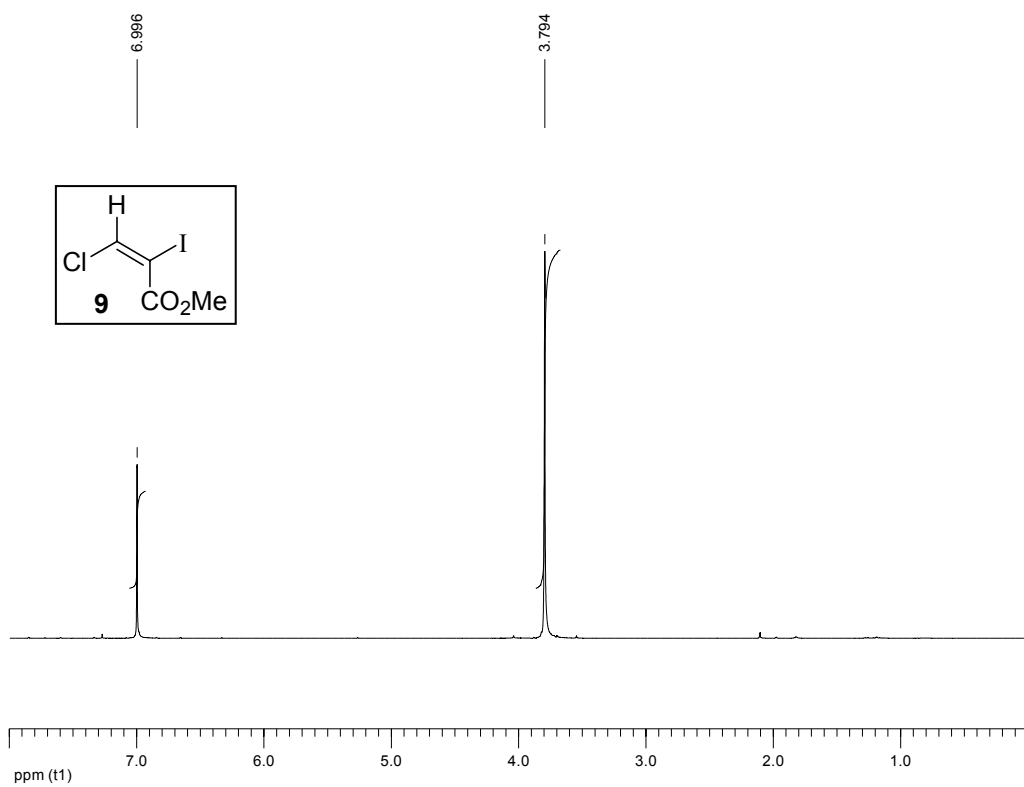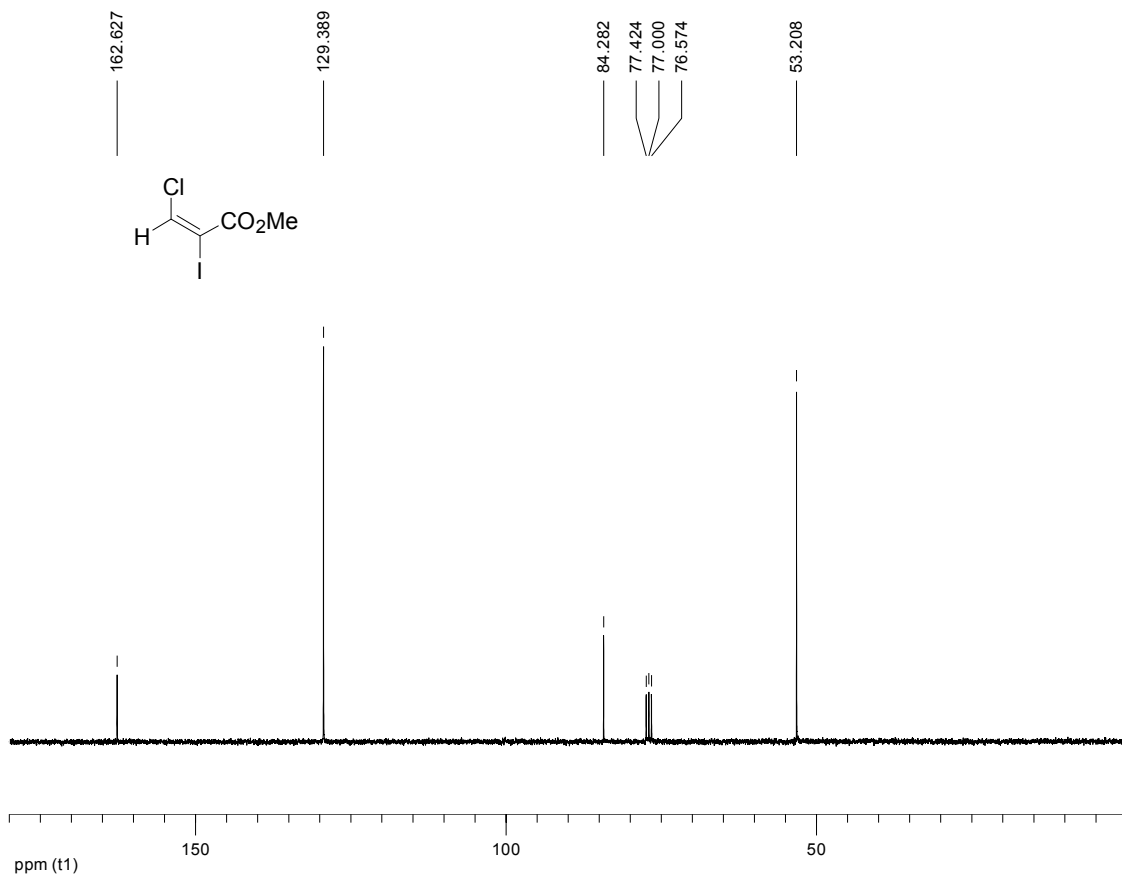

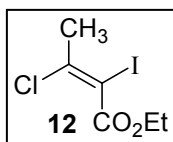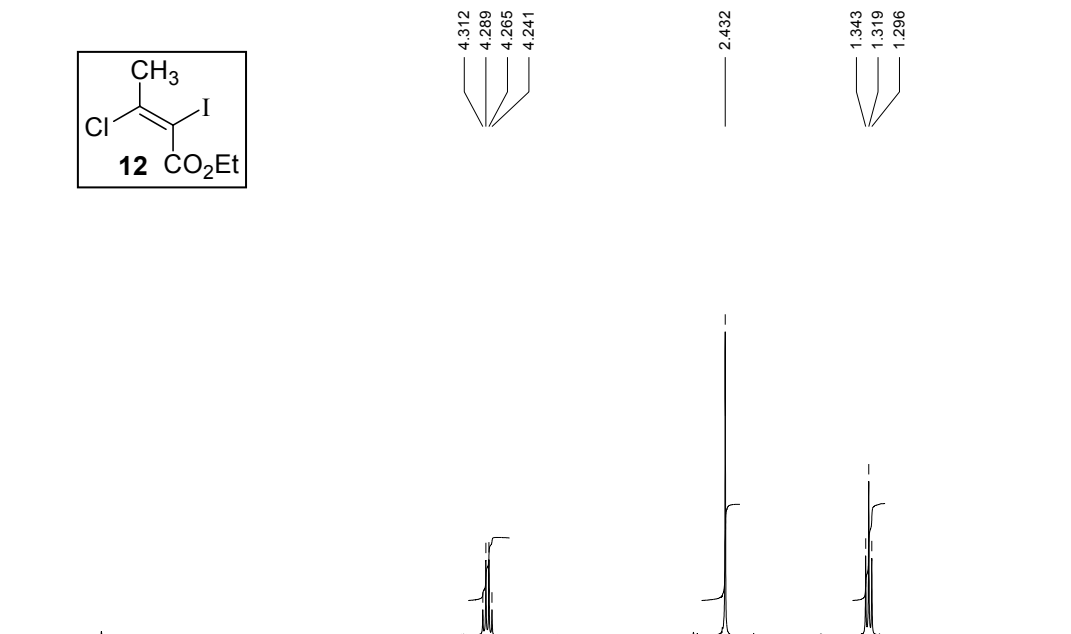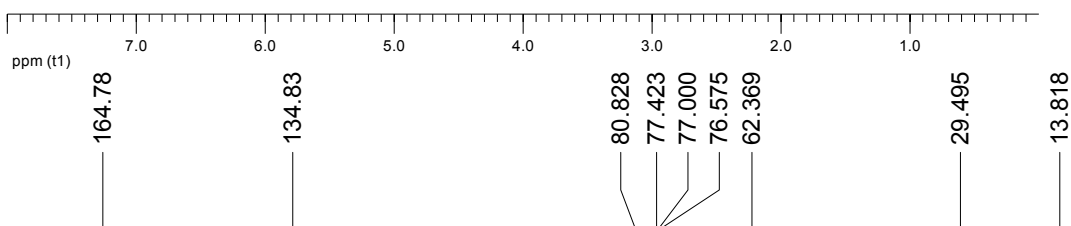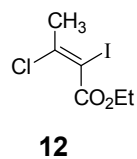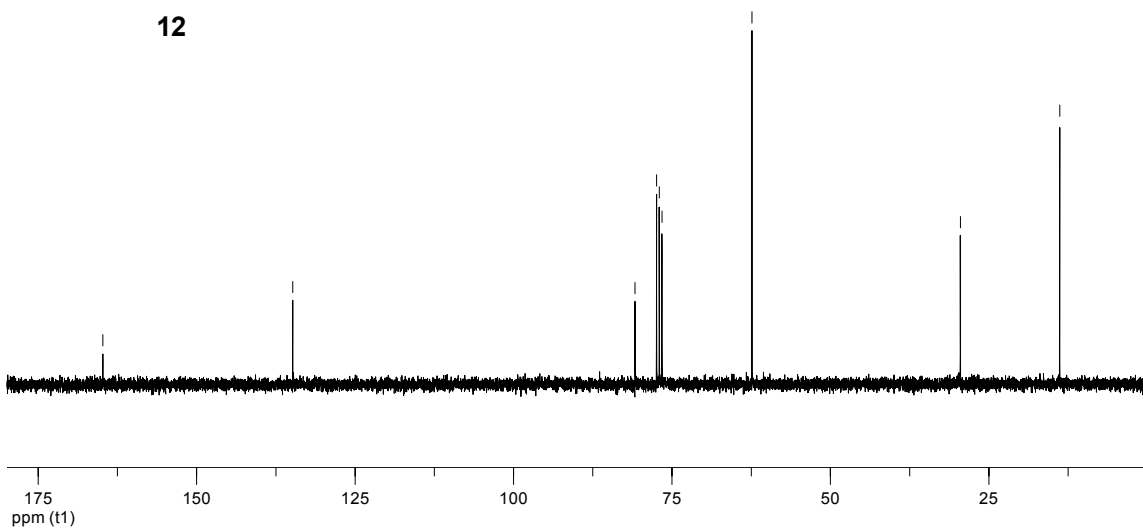

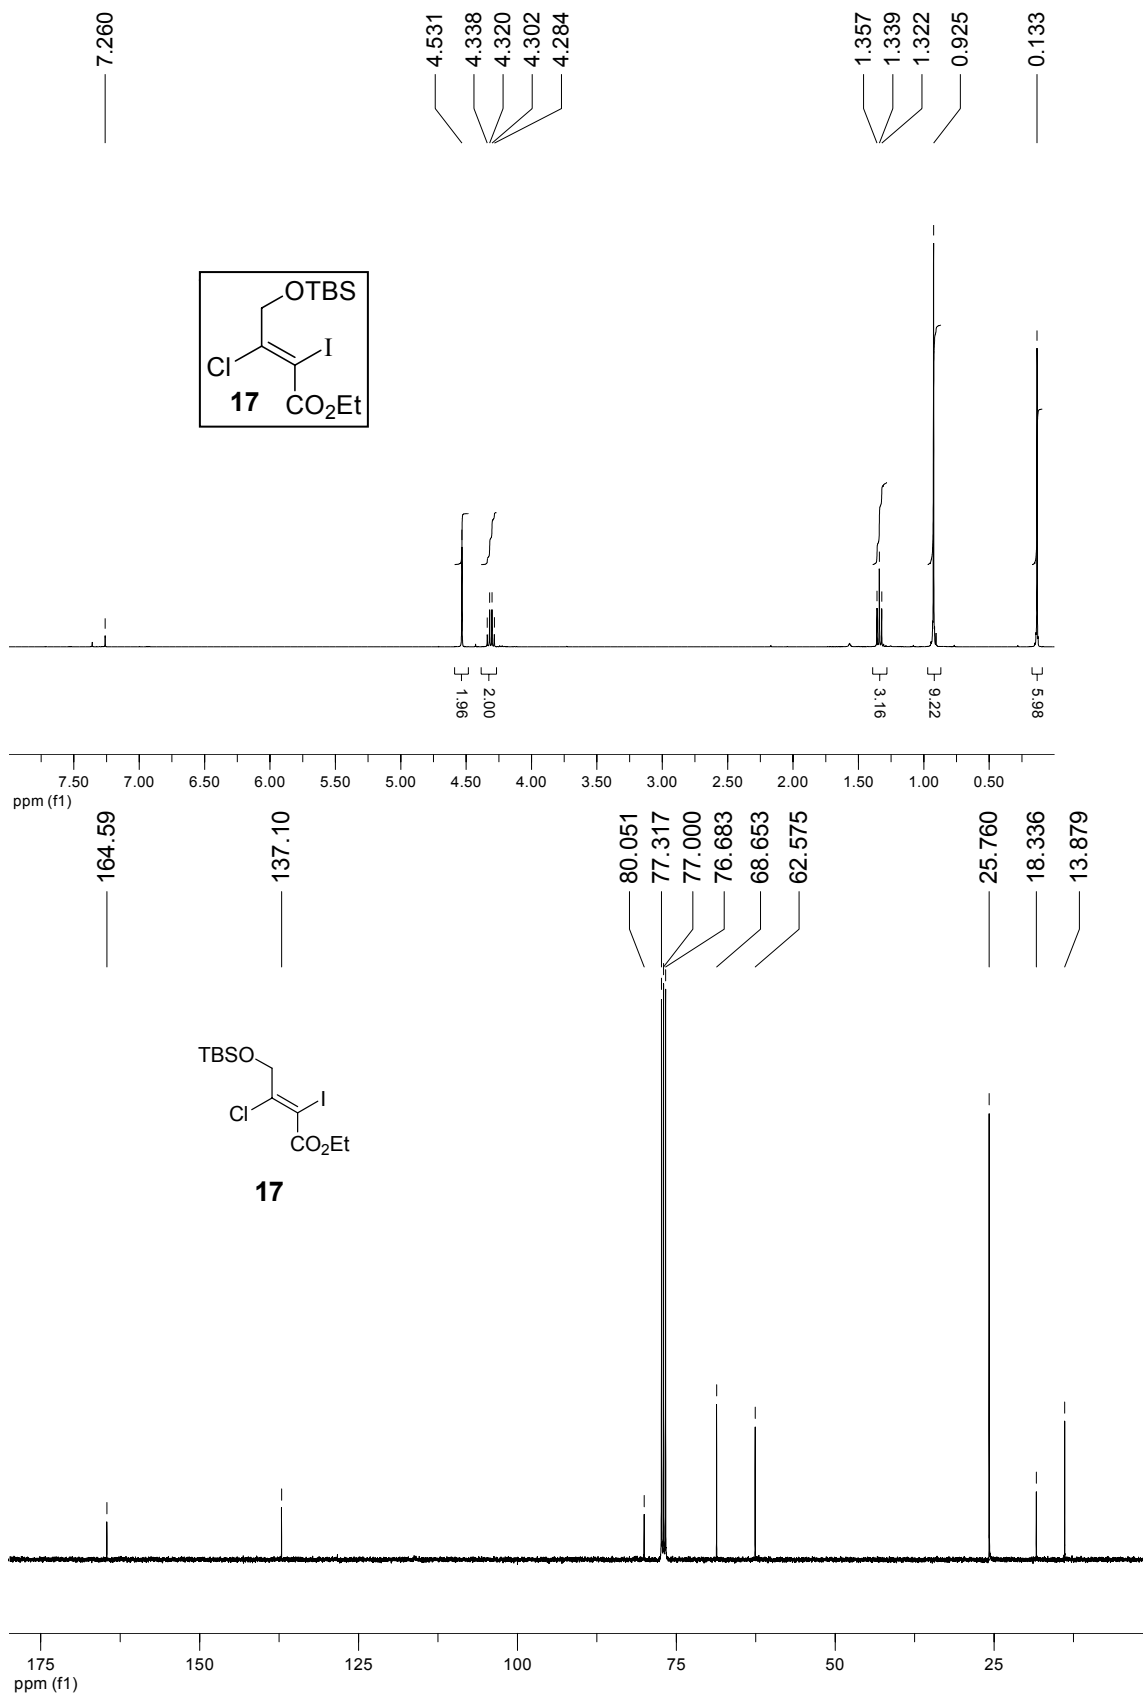

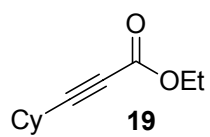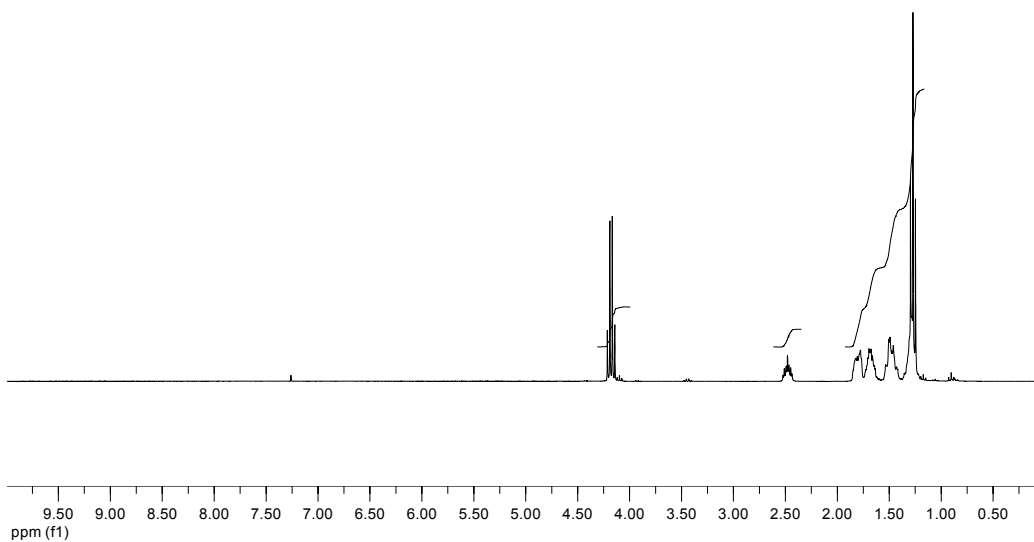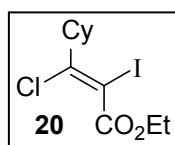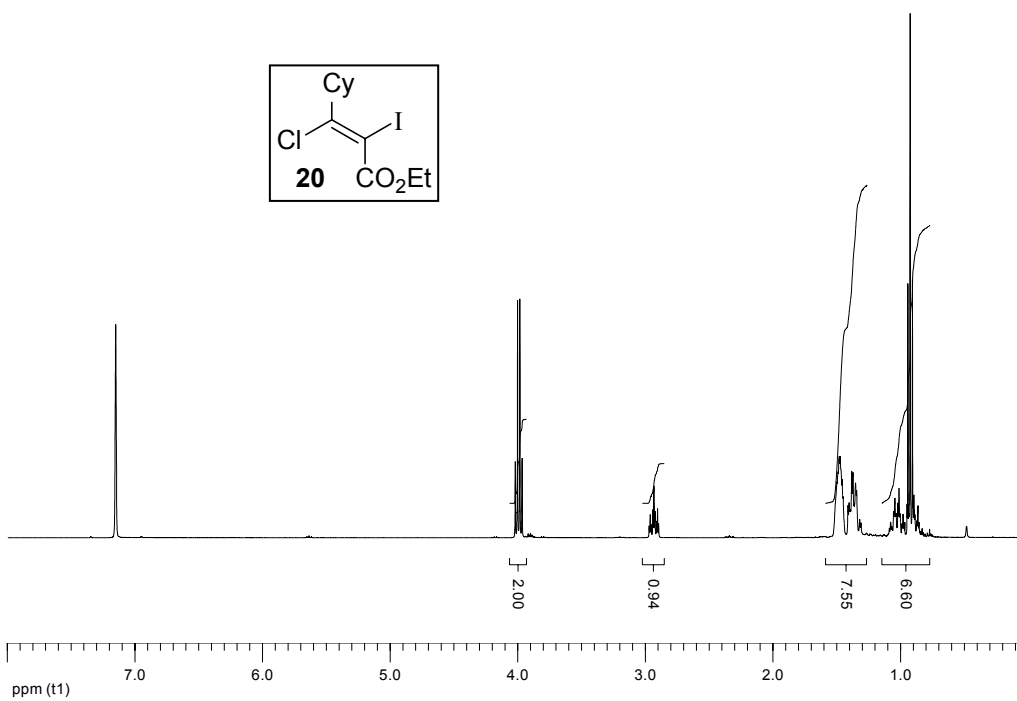



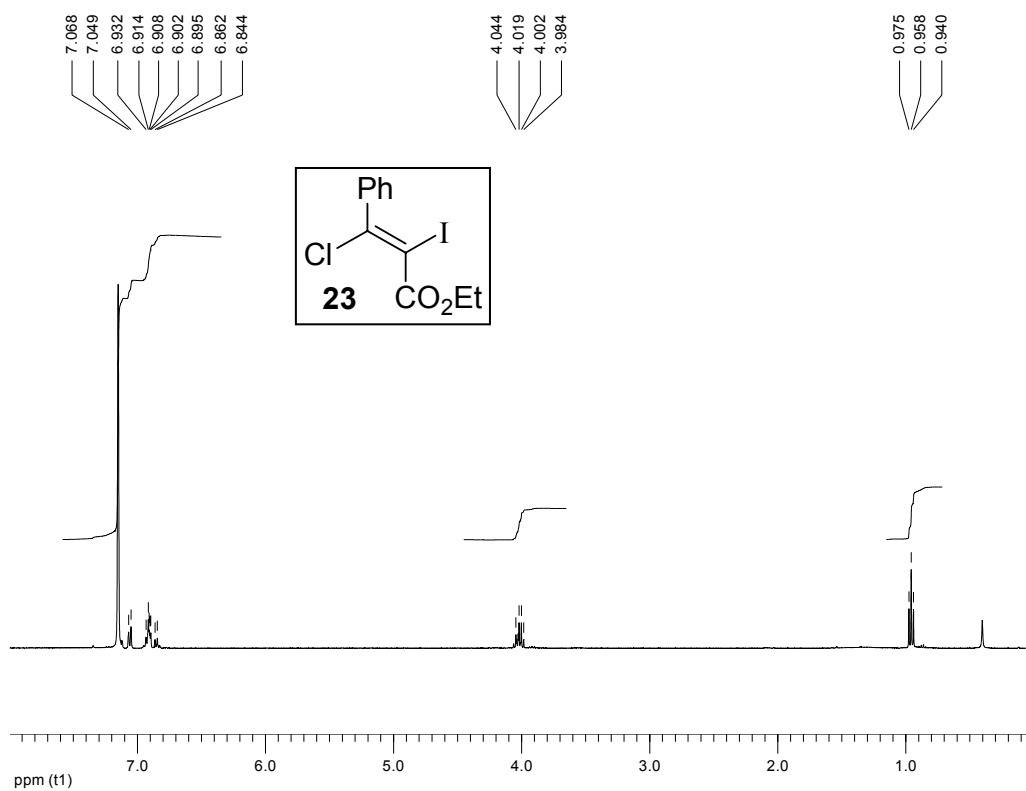

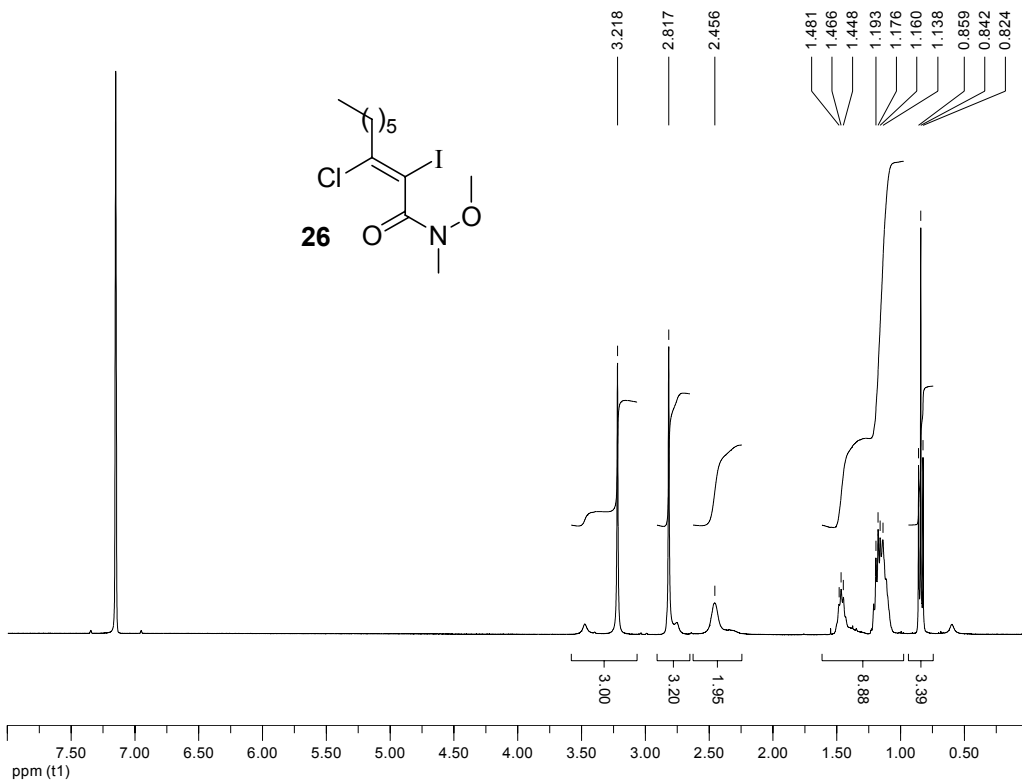

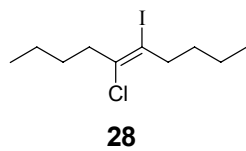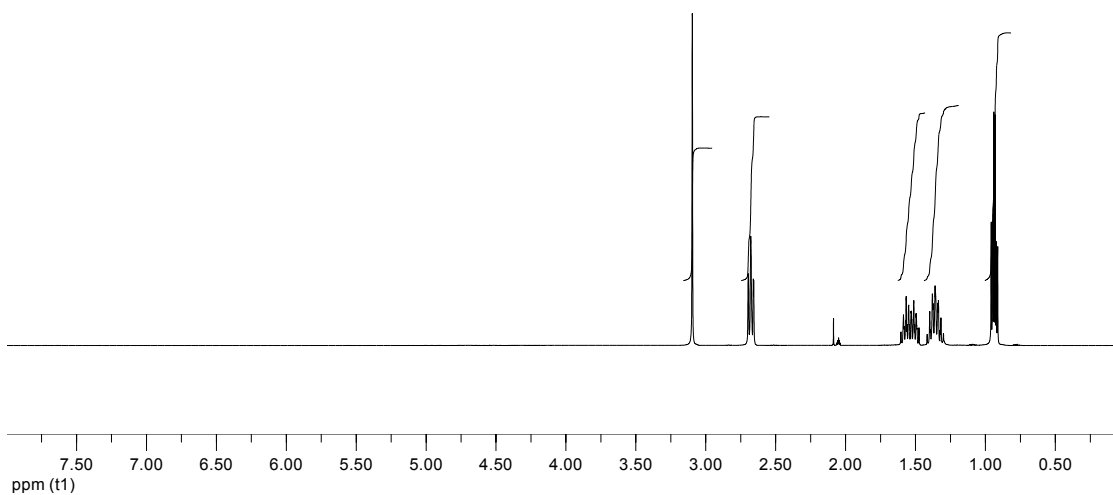

132.981

100.633

44.260  
43.160  
32.202  
31.407  
31.215  
31.022  
30.899  
30.830  
30.638  
30.445  
30.253  
23.289  
23.033  
15.219

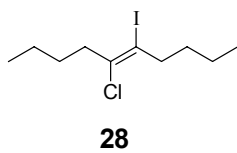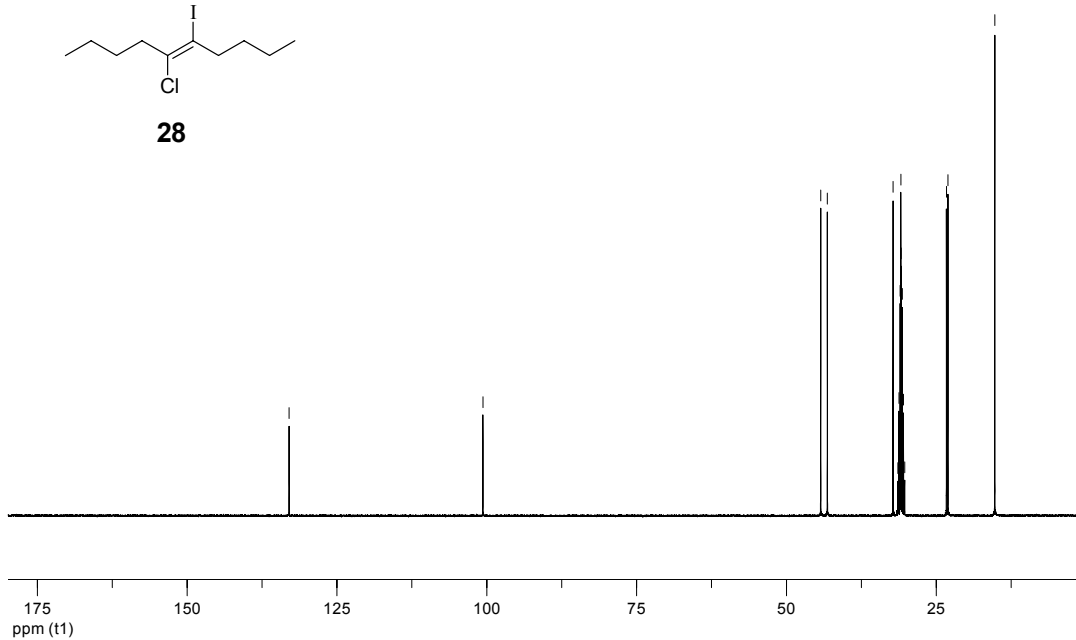

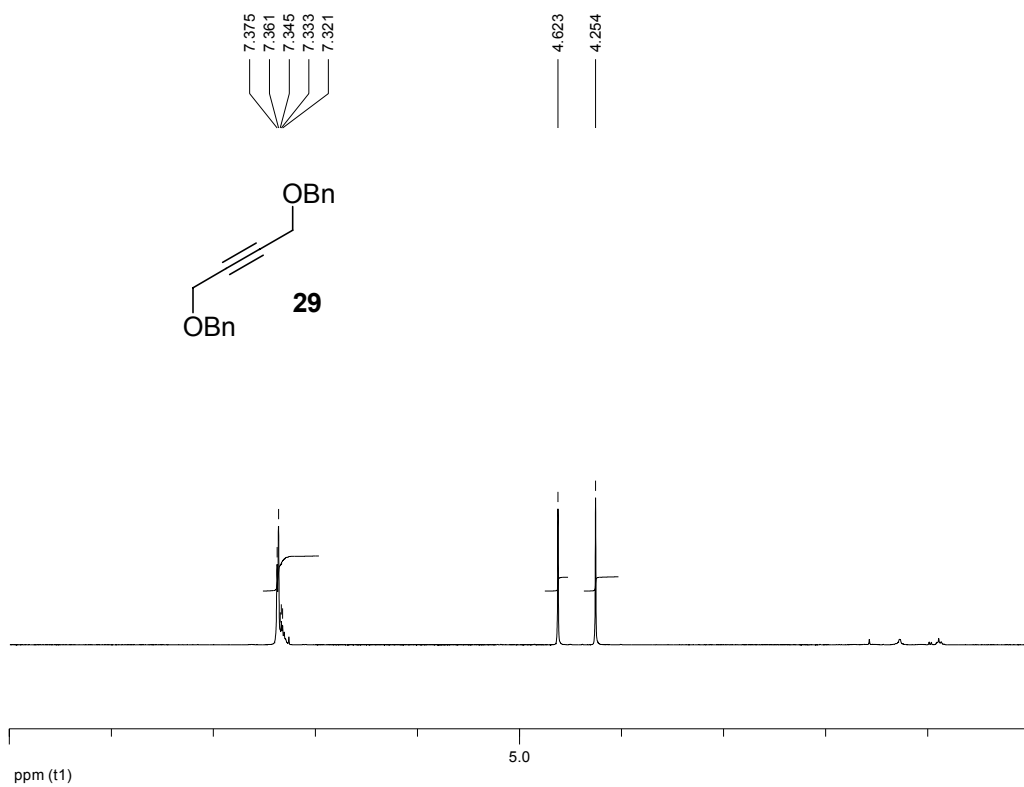

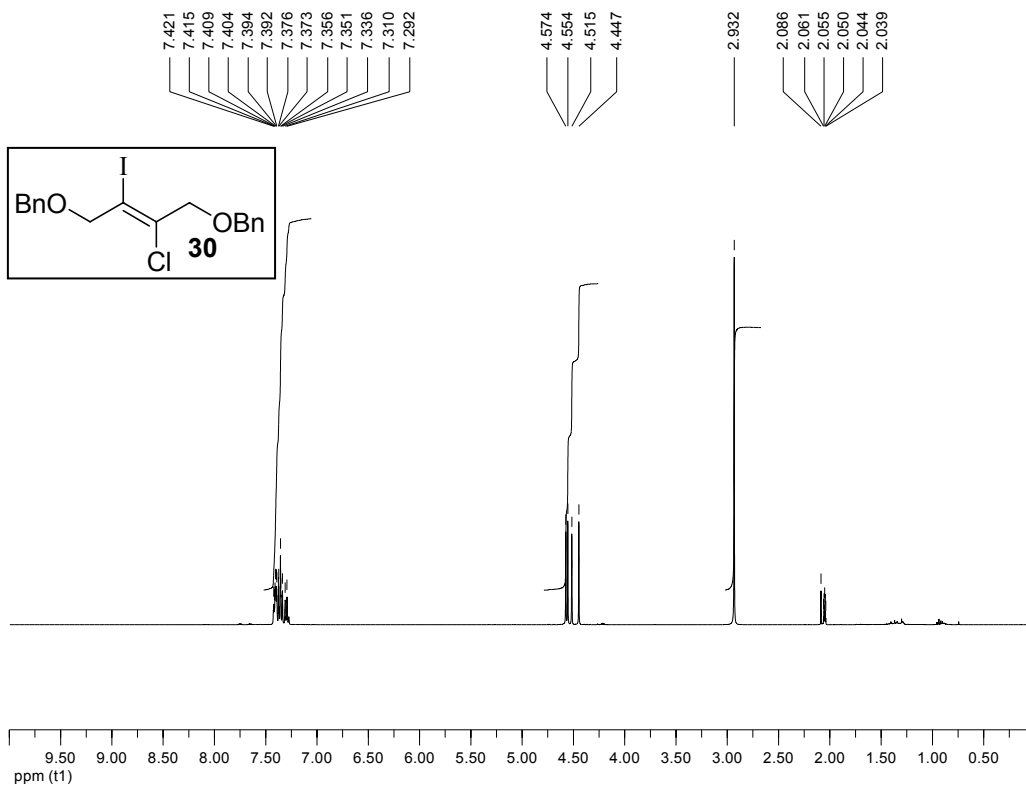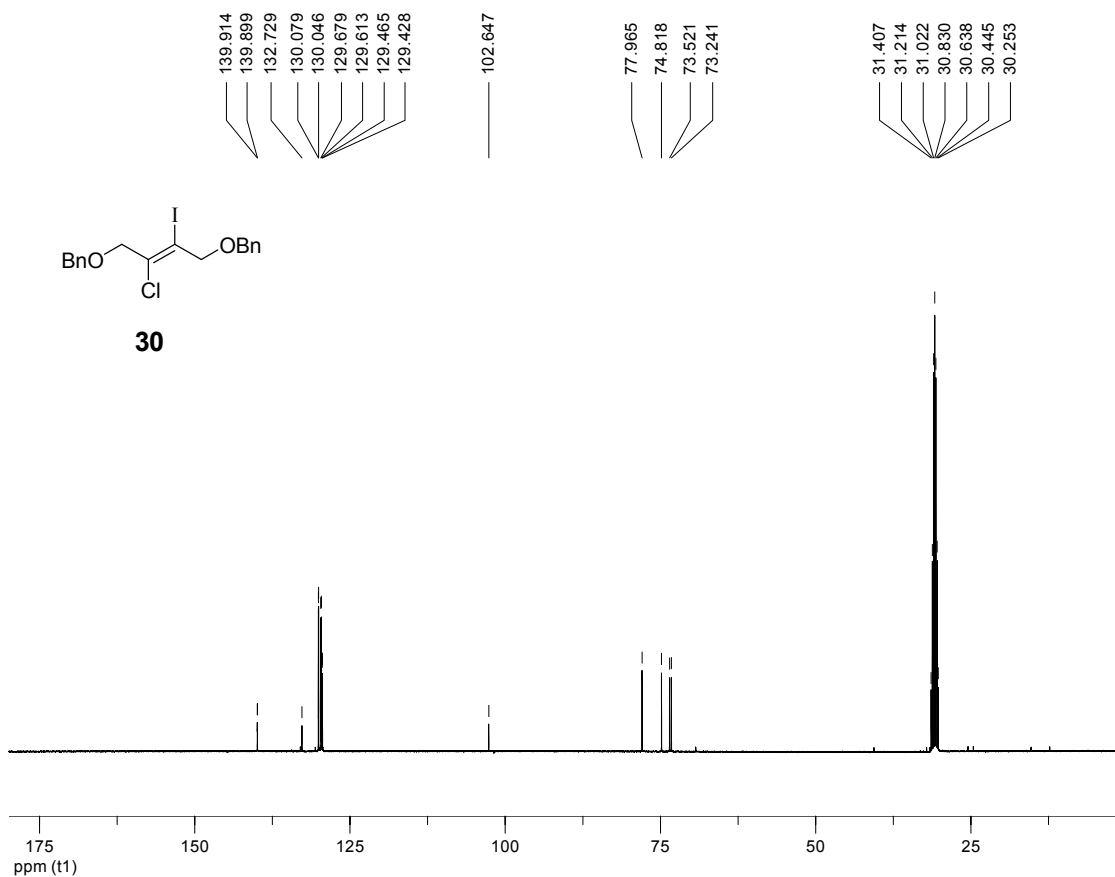

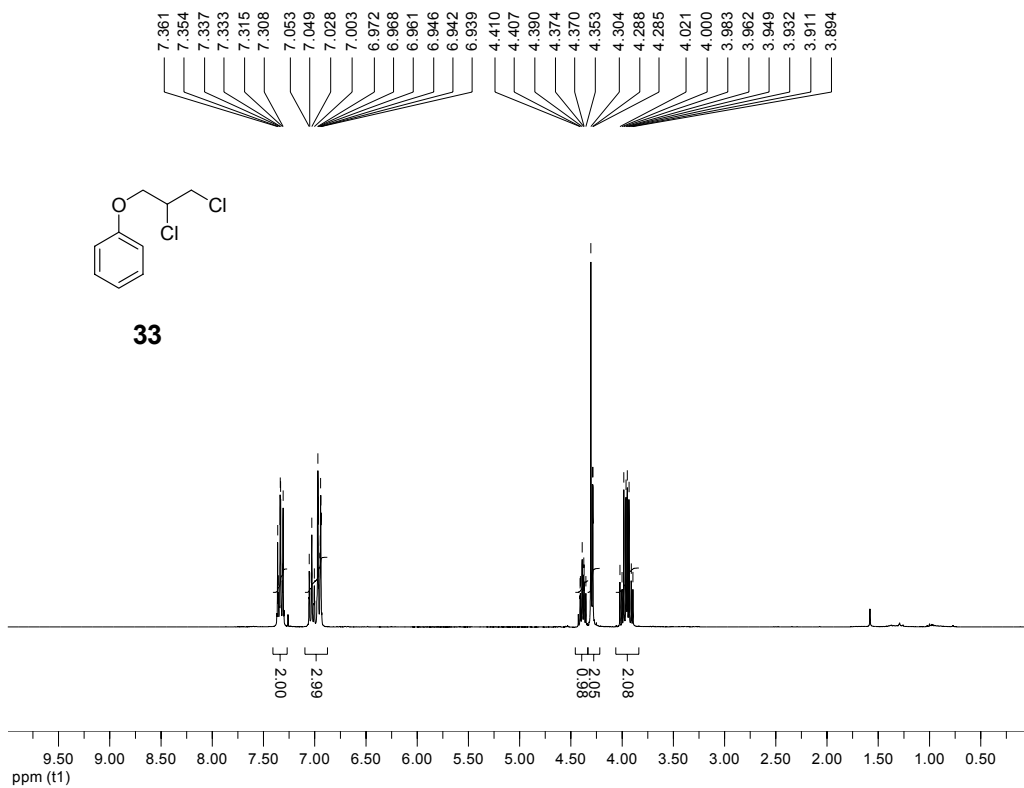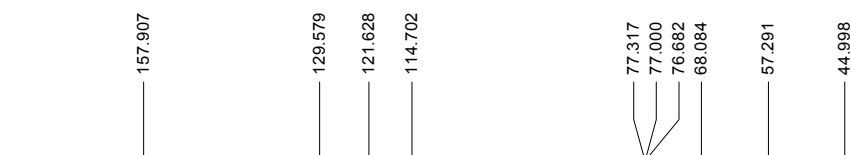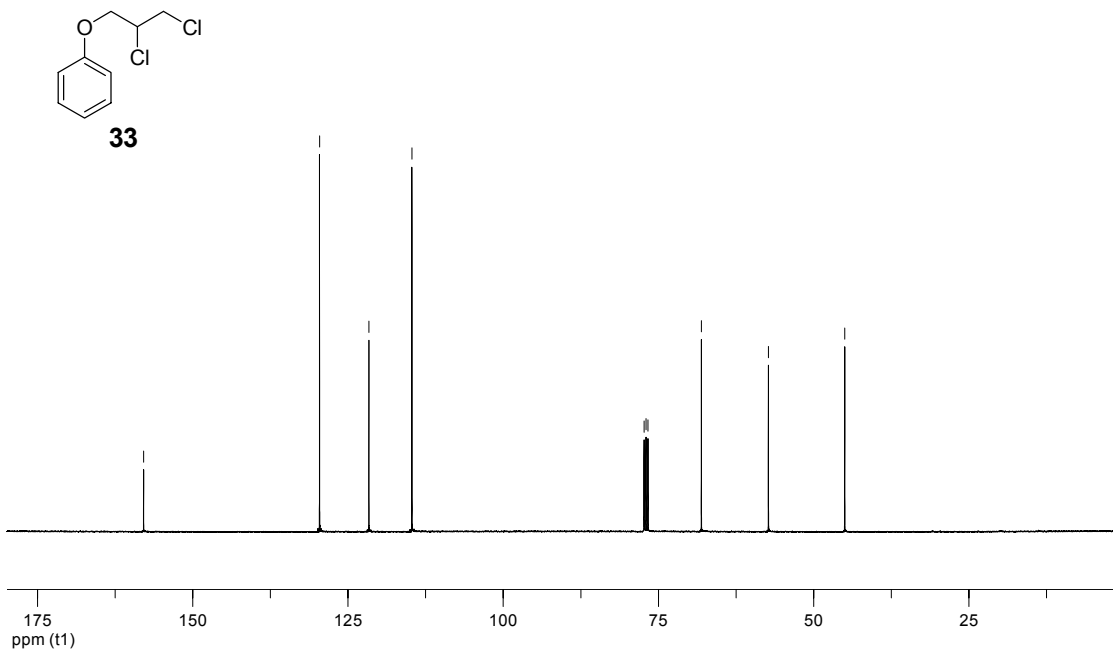

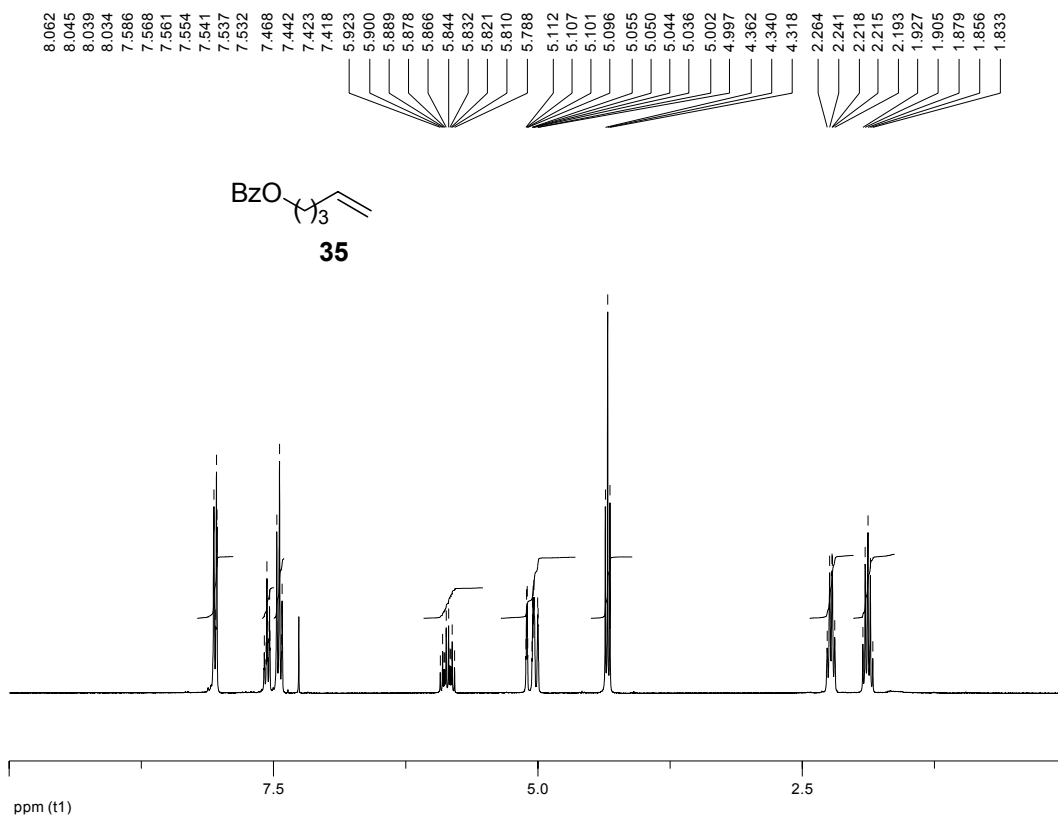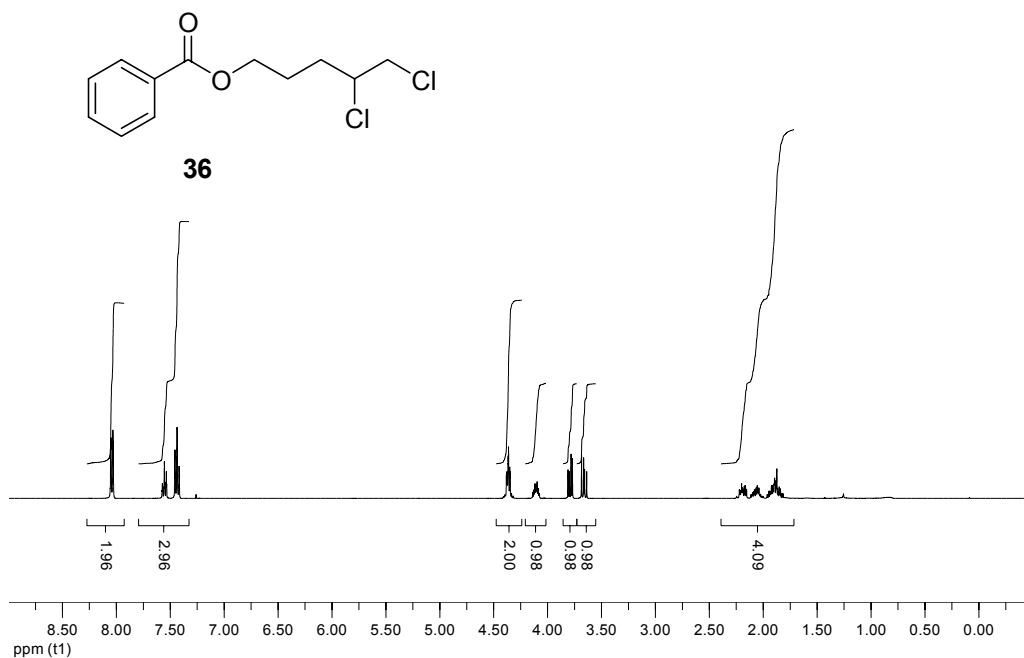

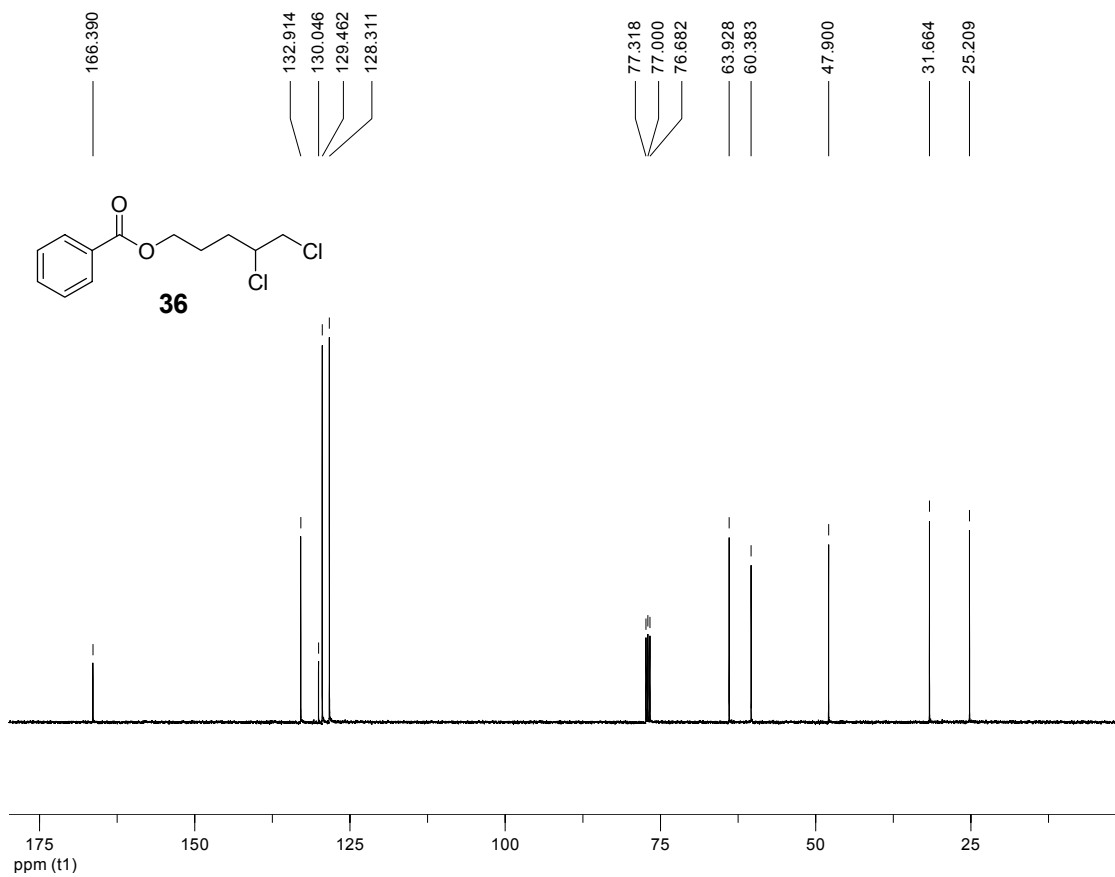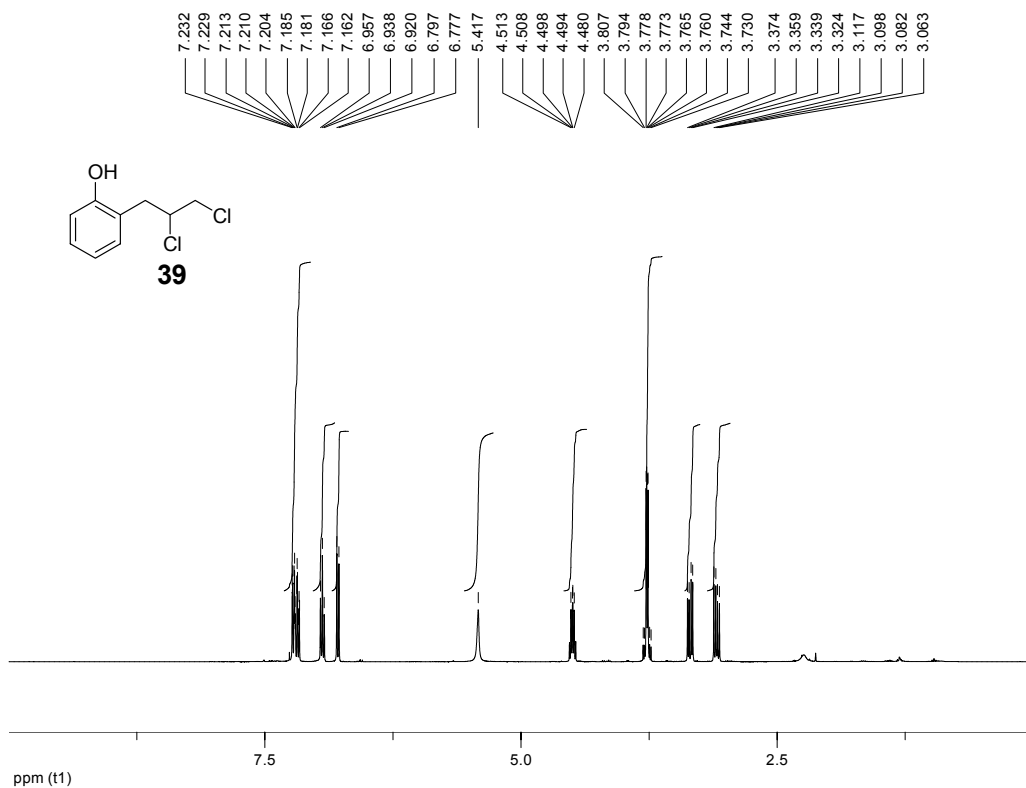



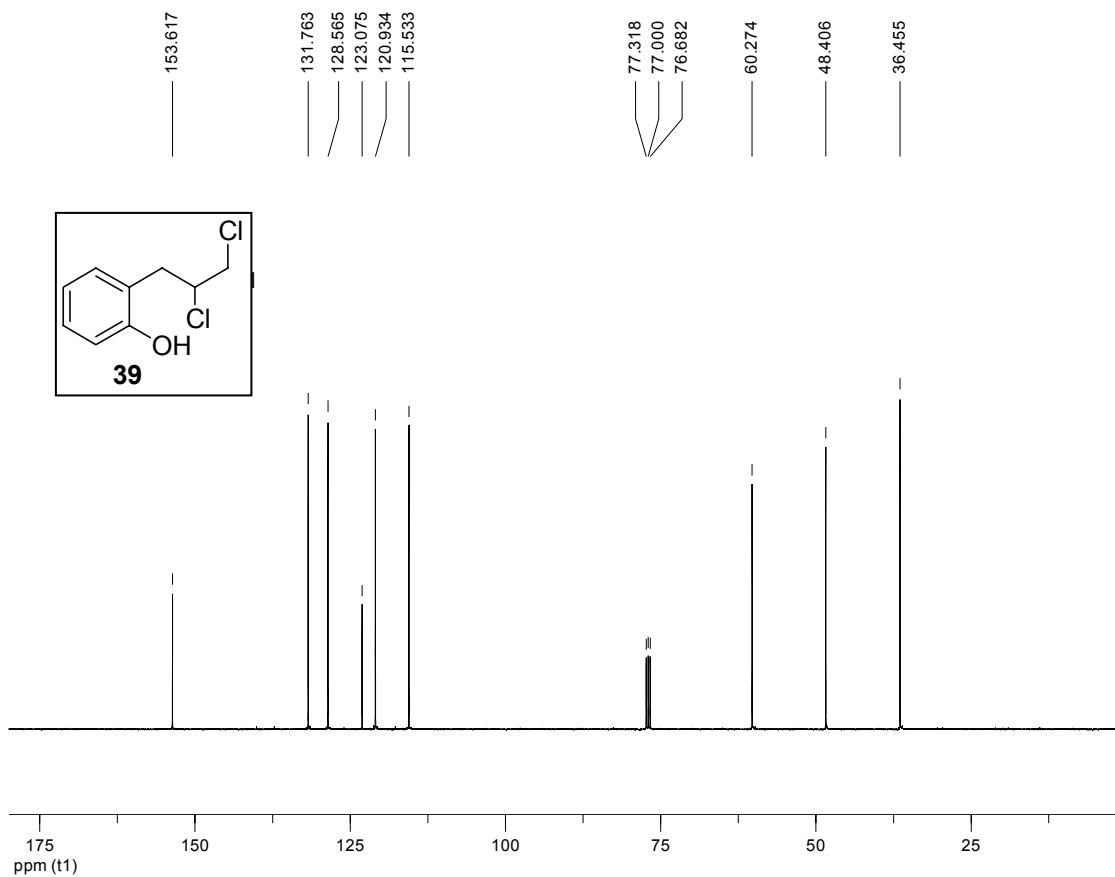

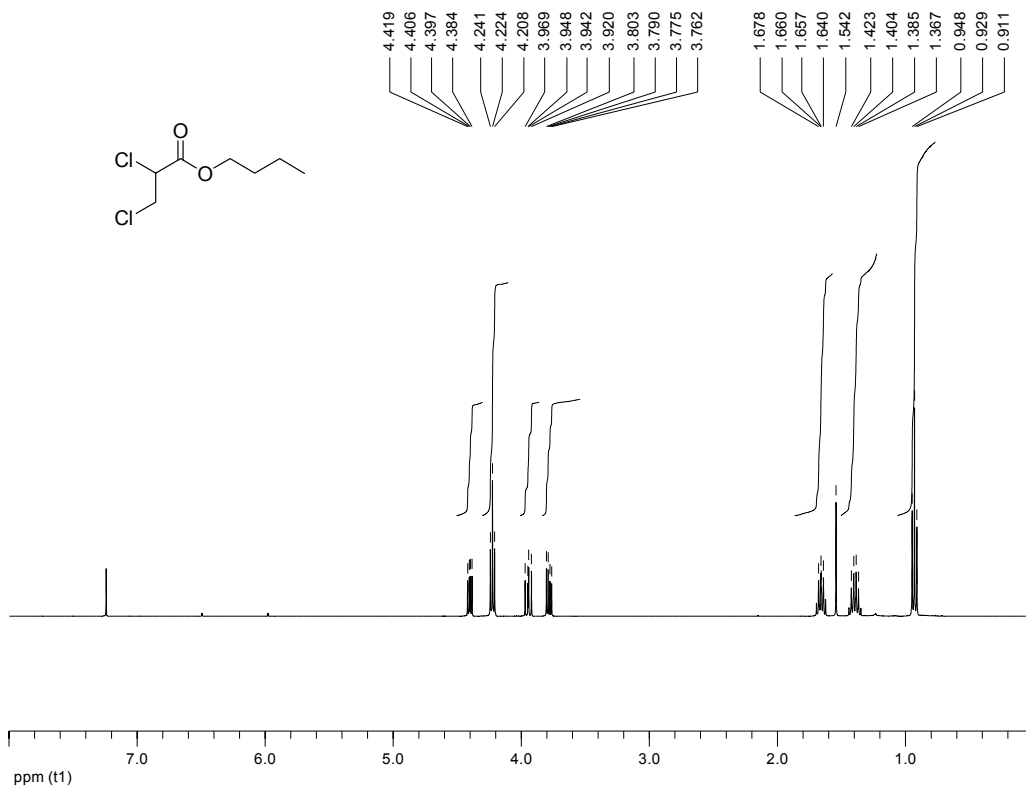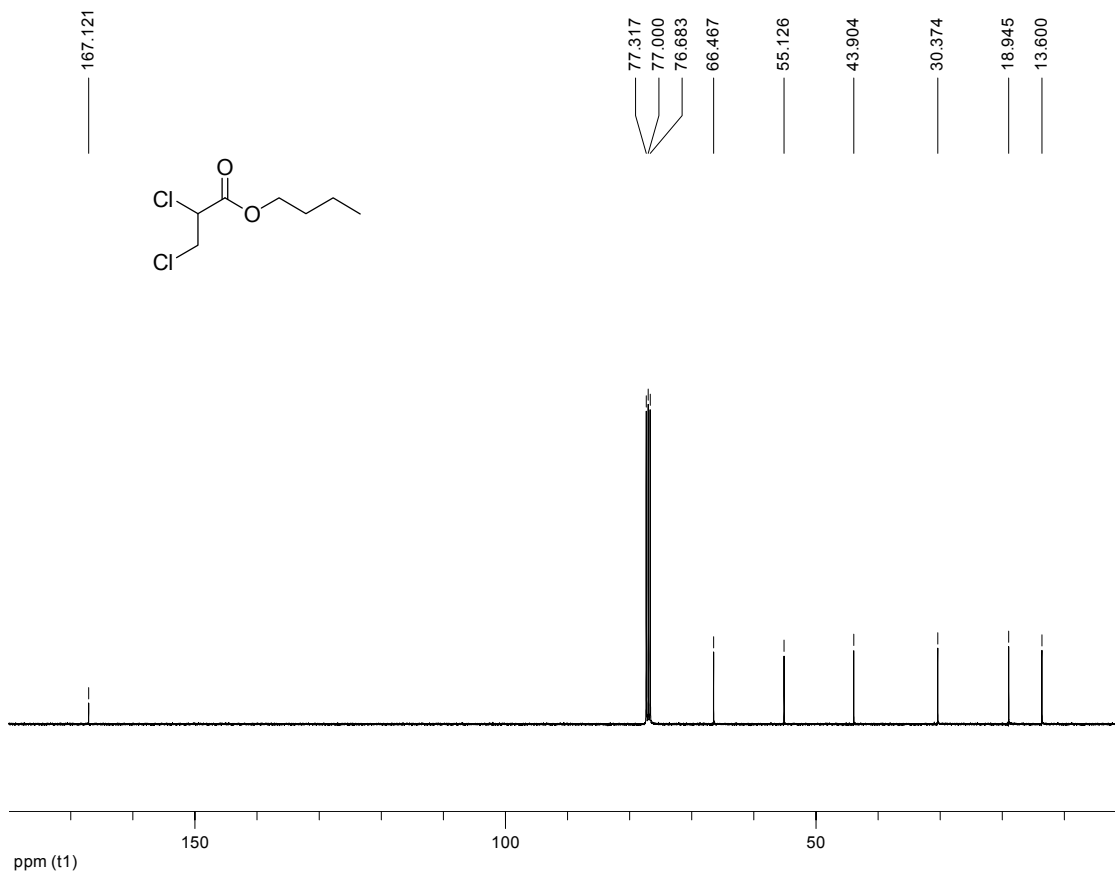

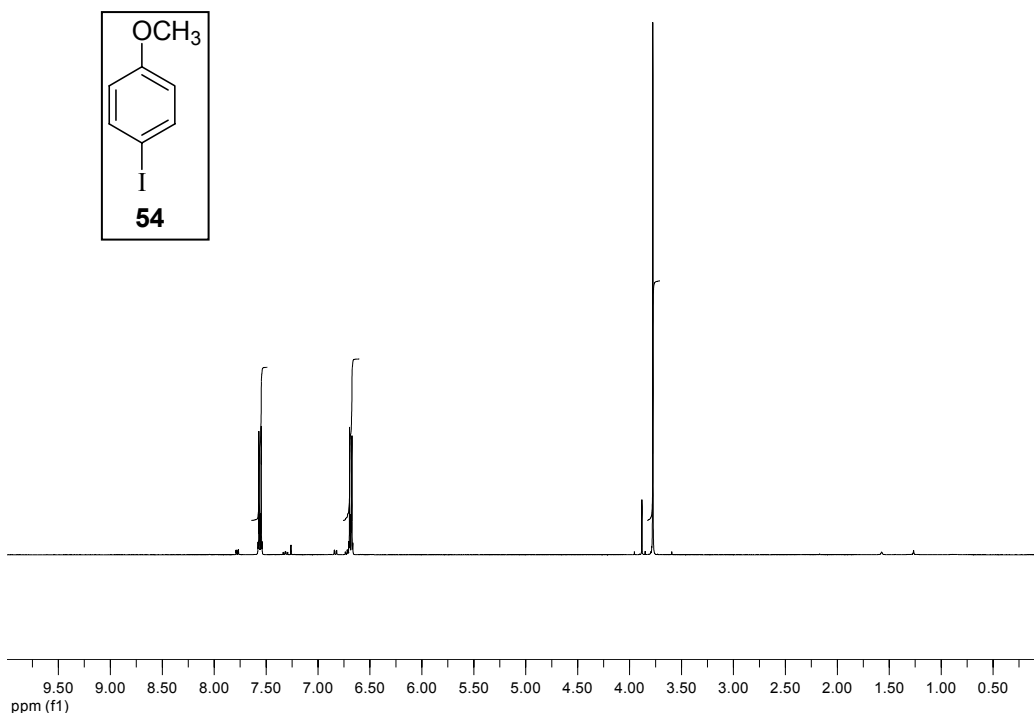

- 
- (1) Lemay, A. B.; Vulic, K. S.; Ogilvie, W. W. *J. Org. Chem.* **2006**, *71*, 3615.
- (2) Smith, A. B. III; Beiger, J. J.; Davulcu, A. H.; Cox, J. M. *Org. Syn.* **2005**, *82*, 147.
- (3) Hecht, S.; Frechet, J. M. J. *J. Am. Chem. Soc.* **1999**, *121*, 4084.
- (4) Alternative preparation from epoxides: (a) Iranpoor, N.; Firouzabadi, H.; Azadi, R.; Ebrahimzadeh, F. *Can. J. Chem.* **2006**, *84*, 69. (b) Firouzabadi, H.; Shiriny, F. *Tetrahedron*, **1996**, *52*, 14929. (c) Iranpoor, N.; Firouzabadi, H.; Aghapour, G.; Nahid, A. *Bull. Chem. Soc. Jap.* **2004**, *77*, 1885.
- (5) Kabalka, G. W. and Gooch, E. E. III. *J. Org. Chem.*, **1980**, *45*, 3578.
- (6) Van, T. N.; Debenedetti, S.; De Kimpe, N. *Tetrahedron Lett.* **2003**, *44*, 4199.

---

(7) Horna, A.; Taborsky, J.; Churacek, J.; Dufka, O. *J. Chromatography* **1985**, 348, 141.

(8) Kabalka, G. W.; Gooch, E. E. III. *J. Org. Chem.* **1980**, 45, 3578.

(9) Zavada, J.; Kruipicka, J.; Kocian, O.; Pankova, M. *Collection of Czechoslovak Chemical Communications* **1983**, 48, 3552.

(10) Bondar, D.; Liu, J.; Müller, T.; Paquette, L. A. *Org. Lett.* **2005**, 7, 1813.
